# Supplementary material for: Hyperthermia Selectively Targets Human Papillomavirus in Cervical Tumors via p53-Dependent Apoptosis
Source: Oxford University Press journal article supplement (doi:10.1158/0008-5472.can-15-0816), 2015-11-16
Supplement: 00085472can150816-sup-147203_2_supp_3118678_ntxt0x.doc [file 00085472can150816-sup-147203_2_supp_3118678_ntxt0x.doc]

Supplementary Table II

| Cell line | p53 status | Treatment | Relative distribution in cell cycle | | |
| --- | --- | --- | --- | --- | --- |
| G0/G1 | S | G2/M |
| RKO | wt | control  RT  p53-siRNA + HT  HT  RT+HT | 50.2  2.2  66.6  2.1  58.6  1.4  31.4  1.0  27.9  1.8 | 15.4  0.7  14.0  1.1  14.2  0.6  15.3  2.1  9.9  1.4 | 34.4  1.4  19.4  1.4  27.2  0.6  53.3  2.4  62.1  1.1 |
| HCT116 | wt | control  RT  p53-siRNA + HT  HT  RT+HT | 58.9  2.2  59.8  2.4  55.3  1.5  28.9  1.7  32.8  2.8 | 19.4  0.6  14.0  1.7  10.5  1.0  12.8  1.4  9.8  0.8 | 21.8  1.0  26.2  0.2  34.1  1.8  58.3  1.3  57.4  2.1 |
| LNCaP | wt | control  RT  p53-siRNA + HT  HT  RT+HT | 67.0  0.7  62.6  0.9  64.4  2.2  43.5  0.5  52.8  2.0 | 13.2  0.4  14.4  0.2  12.8  1.1  18.4  0.6  15.6  0.9 | 19.8  0.4  23.0  1.0  22.8  1.3  38.1  0.5  31.6  2.3 |
| HT3 | mut | control  RT  p53-siRNA + HT  HT  RT+HT | 37.0  0.4  43.7  1.5  37.9  1.6  38.1  0.6  39.7  0.9 | 23.7  0.8  21.4  1.2  19.0  0.7  22.1  0.6  18.4  1.3 | 39.2  1.2  34.9  0.7  43.0  0.3  39.7  0.4  41.8  1.5 |
| C33A | mut | control  RT  p53-siRNA + HT  HT  RT+HT | 50.1  1.7  47.6  2.0  53.1  0.3  45.4  0.9  49.3  1.3 | 25.8  2.6  19.0  1.6  14.7  0.9  20.2  1.1  25.1  2.0 | 24.1  5.6  33.4  1.4  32.2  1.0  34.3  1.5  25.6  3.3 |
| Du145 | mut | control  RT  p53-siRNA + HT  HT  RT+HT | 64.0  1.6  64.7  1.9  65.3  0.3  67.1  1.0  63.6  0.7 | 15.0  1.4  13.6  0.4  14.4  0.3  12.7  0.7  14.2  0.8 | 21.0  1.2  21.7  0.6  20.3  0.6  20.2  0.9  22.2  0.1 |
| HCT116p53-/- | null | control  RT  p53-siRNA + HT  HT  RT+HT | 66.8  0.4  64.7  1.3  66.2  1.5  68.8  0.4  67.0  0.5 | 15.2  0.7  15.7  0.6  15.2  0.7  13.7  0.5  14.8  0.4 | 18.0  0.5  19.7  1.0  18.6  0.4  17.6  0.4  18.3  0.5 |
| PC3 | null | control  RT  p53-siRNA + HT  HT  RT+HT | 58.8  1.2  56.8  0.5  56.9  0.9  57.7  3.5  61.1  0.8 | 17.3  0.5  18.6  0.8  24.8  1.4  17.0  0.5  14.5  1.1 | 24.0  0.7  24.6  0.5  18.3  0.8  25.3  2.3  23.9  0.3 |
