# Supplementary material for: Hyperthermia Selectively Targets Human Papillomavirus in Cervical Tumors via p53-Dependent Apoptosis
Source: Oxford University Press journal article supplement (doi:10.1158/0008-5472.can-15-0816), 2015-11-16
Supplement: 00085472can150816-sup-147203_2_supp_3118679_ntmt0m.doc [file 00085472can150816-sup-147203_2_supp_3118679_ntmt0m.doc]

Supplementary Table III

|  | RT | | RT + HT | |  |
| --- | --- | --- | --- | --- | --- |
|  | α-value  SEM | β-value  SEM | α-value  SEM | β-value  SEM | α-enhancement factor |
| SiHa | 0.158  0.022 | 0.080  0.005 | 0.670  0.063 | 0.042  0.013 | 4.24  0.71* |
| HeLa | 0.075  0.025 | 0.088  0.005 | 0.423  0.028 | 0.052  0.007 | 5.64  1.92* |
